# Supplementary material for: Key Role of Hyaluronan Metabolism for the Development of Brain Metastases in Triple-Negative Breast Cancer
Source: MDPI journal article supplement (doi:10.3390/cells11203275), 2022-10-18
Supplement: s1 [file s1]

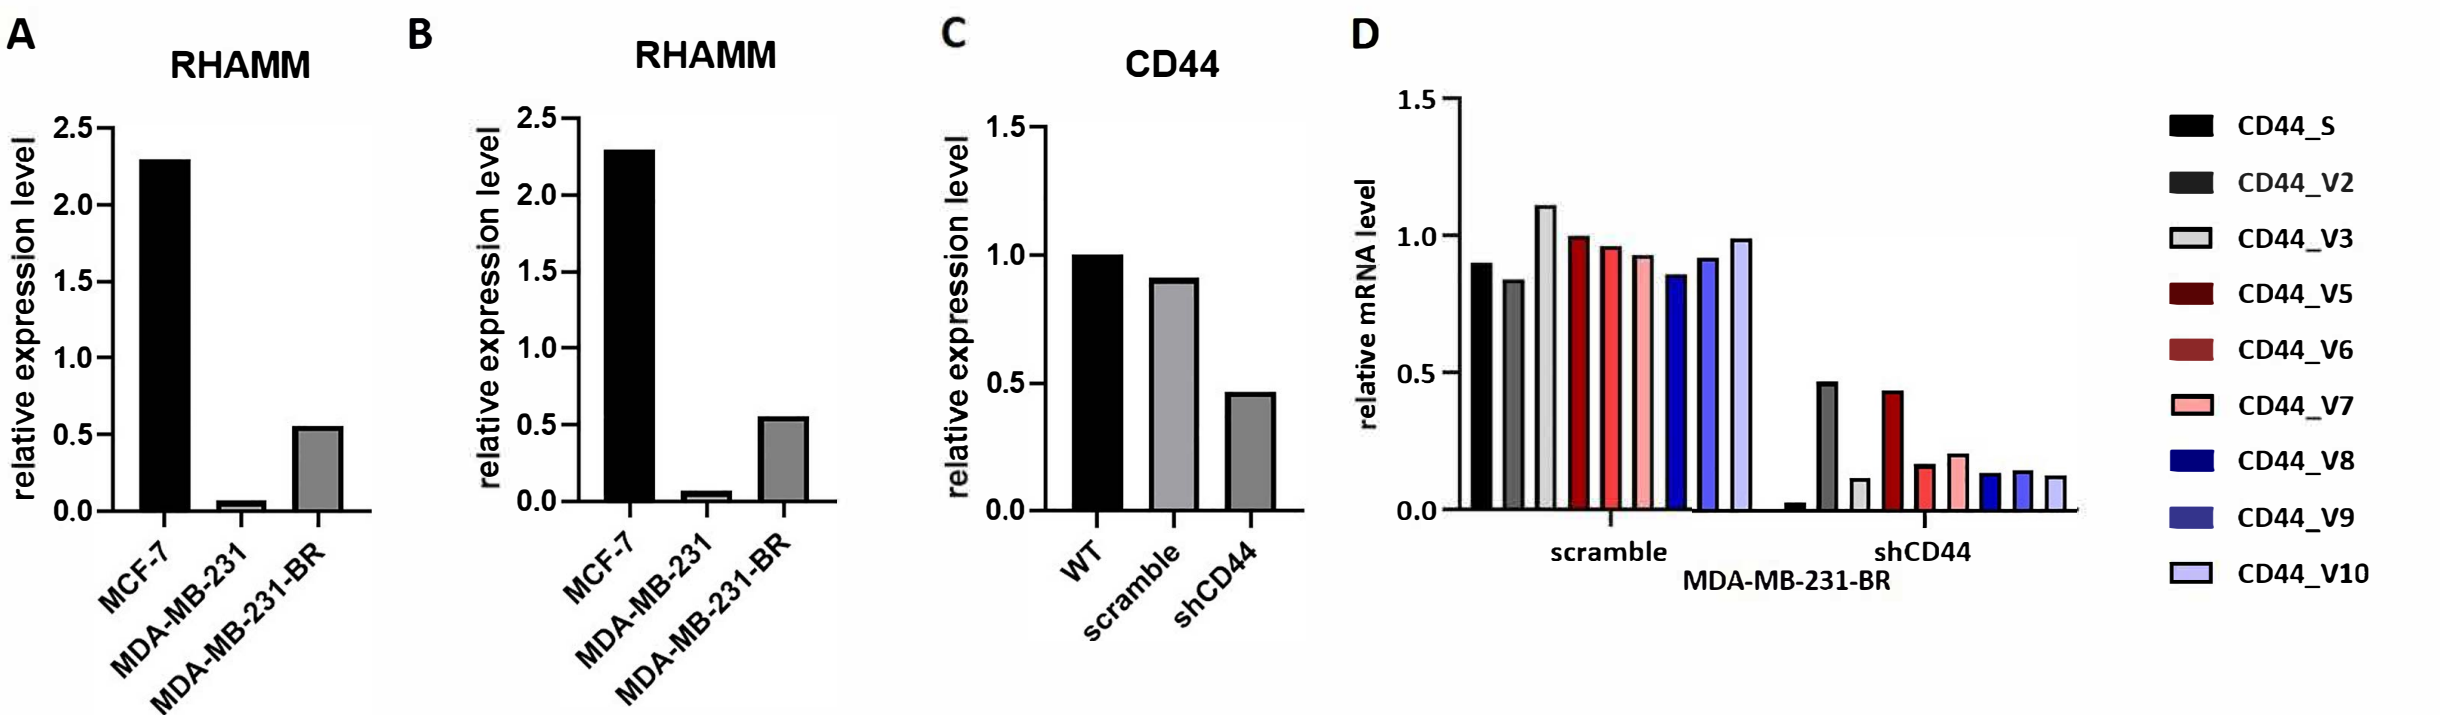

**Supplementary Figure S3: Quantification of protein expression and expression of CD44 variants in MDA-MB-231-BR CD44 knockdown cells as well as MCF-7 overexpressing cells**

**(A)** Relative protein expression from representative Western Blot was quantified by densitometry of RHAMM for MCF-7, MDA-MB-231 and MDA-MB-231-BR cells. **(B)** Relative protein expression from representative Western Blot was quantified by densitometry of RHAMM for MCF-7 overexpressing cells. Expression level of empty vector was set as 1. **(C)** Relative CD44 mRNA level of CD44 standard (CD44\_S) and variable exons (CD44\_V1-10) in MDA-MB-231-BR control (scramble) and CD44 KD (shCD44) measured by qRT-PCR. Values are normalized to corresponding GAPDH expression. **(D)** Relative protein expression from representative Western Blot was quantified by densitometry of CD44 from MDA-MB-231-BR control cells as well as CD44 knockdown cells. Expression level of MDA-MB-231-BR WT cells was set as 1. Statistical significance was determined using unpaired two-tailed Student's t-tests. The assumption of homogeneity of variance was tested using Levene's Test of Equality of Variances ( $p>0.05$ ). Values are means  $\pm$  s.d.
