# Supplementary material for: Key Role of Hyaluronan Metabolism for the Development of Brain Metastases in Triple-Negative Breast Cancer
Source: MDPI journal article supplement (doi:10.3390/cells11203275), 2022-10-18
Supplement: s1 [file s1]

## CRISPR/Cas9-HYAL1 knockout in MDA-MB-231-BR

The guide RNAs for the HYAL1 knockout (KO) were generated using the CRISPR guide RNA design tool *guide scan*. The following two guide sequences were used:

1. **guide #1** (score:27, off-targets:0, Exon2, coordinates: chr3:50302887-50302909)  
Guide sequence: CGATATGGCCCAAGGCTTTA NGG  
Guide1: 5'CACC CGATATGGCCCAAGGCTTTA 3'  
Complementary: 3'GCTATACCGGGTCCGAAATCAAA 5'
2. **guide #2** (score:61, off-targets:0, Exon2, coordinates: chr3:50302895-50302917)  
Guide sequence: ACCTTACTCGATATGGCCCA NGG  
Guide1: 5'CACC ACCTTACTCGATATGGCCCA 3'  
Complementary: 3'TGGAATGAGCTATACCGGGTCAAA 5'

For further cloning, the sgRNA oligos named HYAL1\_e2\_g1 and HYAL1\_e2\_g2 were designed:

HYAL1\_e2\_g1 (FP: CACCCGATATGGCCCAAGGCTTTA; RP:

AAACTAAAGCCTTGGGCCATATCG) HYAL1\_e2\_g2 (FP: CACCACCTTACTCGATATGGCCCA;

RP: AAAGTGGGCCATATCGAGTAAGGT)

### Genomic DNA isolation and Sanger sequencing

Isolation of genomic DNA was performed using QIAamp DNA Mini Kit (#51304, Qiagen, Hilden, Germany) according to manufacturer's instruction. For amplification of the genomic region targeted by the CRISPR/Cas9, PCR from genomic DNA of control cells (Ctrl) and HYAL1 KO cells and following primer was performed: HYAL1\_seq\_e2\_g1/2 (FP CCGTGGATTAATGCGCAAGG; RP GTAGTAGG GGTAGGTGCCCA). Sanger sequencing analysis was done by TGCA Company, National Cancer Institute, Bethesda, Maryland, USA.

### **QRT-PCR primer sequences for CD44 splice variants**

CD44\_S (FP: AGTCACAGACCTGCCCAATGCCTTT; RP: TTTGCTCCACCTTCTTGACTCCCATG)

CD44\_V2 (FP: GACAGCAACCAAGAGGCAAG; RP: TTTGTGTTGTTGTGTGAAGATGATT)

CD44\_V3 (FP: CGTCTTCAAATACCATCTCAGCA; RP: ATCTTCATCATCAATGCCTGA)

CD44\_V4 (FP: AACCACACCACGGGCTTT; RP: CATCCTTGTTGGTTGTCTGAAGTA)

CD44\_V5 (FP: ATGTAGACAGAAATGGCACCAC; RP: GTGCTTGTAGAATGTGGGGTC)

CD44\_V6 (FP: GGCAACTCCTAGTAGTACACCG; RP: GTCTTCTCTGGGTGTTTGGC)

CD44\_V7 (FP: CTCATACCAGCCATCCAATGC; RP: CTTCTTCCTGCTTGATGACCTC)

CD44\_V8 (FP: CTCCAGTCATAGTATAACGCTTCA; RP: GTTGTCATTGAAAGAGGTCCTGT)

CD44\_V9 (FP: AGCAGAGTAATTCTCAGAGCTTC; RP: CAGAGTAGAAGTTGTTGGATGGT),

CD44\_V10 (FP: ATCATTTCTGAAGGCTCAACTACTT; RP: TAAGGAACGATTGACATTAGAGTTG)

### **QRT-PCR primer sequences**

Alu-PCR Primer (FP: TGGCTCACGCCTGTAATCCCA; RP: GCCACTACGCCCCGGCTAATTT)

HAS1 (FP: GGCCTGGTACAACCAGAAGT; RP: CCTGGAGGTGTAAGTGGTAGC) HAS2 (FP:

TGGGGGAGATGTCCAGATTT; RP: CCAAAGCTACATTGGTTGCCC)

HAS3 (FP: TGGACTACATCCAGGTGTGC; RP: TGCACACAGCCAAAGTGGA)

HYAL1 (FP: CTGCTGGTGACCCCAATCT; RP: GAAGGGCCCCAGTGTAGTGT)

HYAL2 (FP: TCGTGGCTGACTCCCATATA; RP: ACGCTGGCCCTTTAAGACTC)

GAPDH (FP: GTCAGTGGTGGACCTGACCT; RP: TGCTGTAGCCAAATTCGTTG)

## Antibodies for Western Blot method

| Detection        | Blocking                                              | 1st Antibody                                       | 2nd Antibody                                     |
|------------------|-------------------------------------------------------|----------------------------------------------------|--------------------------------------------------|
| <b>β-Actin</b>   | 5 % MP for 1 h at RT                                  | 1:2000, in 1.5 % MP in TBS-T,<br>overnight, 4 °C   | α-rabbit, 1:8000 in 1,5 %<br>MP in TBS-T, 1 h RT |
| <b>β-Catenin</b> | 5 % MP for 1 h at RT<br>and 3x 5 Min TBS-T<br>washing | 1:1000, in 5 % BSA in TBS-T,<br>overnight, 4 °C    | α-rabbit, 1:8000 in 1,5 %<br>MP in TBS-T, 1 h RT |
| <b>CD44</b>      | 5 % MP for 1 h at RT                                  | 1:200, in 1.5 % MP in TBS-T,<br>overnight, 4 °C    | α-mouse, 1:8000 in 1,5 %<br>MP in TBS-T, 1 h RT  |
| <b>HSC-70</b>    | 5 % MP for 1 h at RT                                  | 1:100000, in 1.5 % MP in<br>TBS-T, overnight, 4 °C | α-mouse, 1:8000 in 1,5 %<br>MP in TBS-T, 1 h RT  |
| <b>RHAMM</b>     | 5 % MP for 1 h at RT                                  | 1:100, in 1.5 % MP in TBS-T,<br>overnight, 4 °C    | α-mouse, 1:8000 in 1,5 %<br>MP in TBS-T, 1 h RT  |
| <b>Slug</b>      | 5 % MP for 1 h at RT<br>and 3x 5 Min TBS-T<br>washing | 1:1000, in 5 % BSA in TBS-T,<br>overnight, 4 °C    | α-rabbit, 1:8000 in 1,5 %<br>MP in TBS-T, 1 h RT |
| <b>Snail</b>     | 5 % MP for 1 h at RT<br>and 3x 5 Min TBS-T<br>washing | 1:2000, in 5 % BSA in TBS-T,<br>overnight, 4 °C    | α-rabbit, 1:8000 in 1,5 %<br>MP in TBS-T, 1 h RT |
| <b>TCF8/ZEBa</b> | 5 % MP for 1 h at RT<br>and 3x 5 Min TBS-T<br>washing | 1:1000, in 5 % BSA in TBS-T,<br>overnight, 4 °C    | α-rabbit, 1:8000 in 1,5 %<br>MP in TBS-T, 1 h RT |
| <b>Vimentin</b>  | 5 % MP for 1 h at RT<br>and 3x 5 Min TBS-T<br>washing | 1:2000, in 5 % BSA in TBS-T,<br>overnight, 4 °C    | α-rabbit, 1:8000 in 1,5 %<br>MP in TBS-T, 1 h RT |
| <b>ZO-1</b>      | 5 % MP for 1 h at RT<br>and 3x 5 Min TBS-T<br>washing | 1:1000, in 5 % BSA in TBS-T,<br>overnight, 4 °C    | α-rabbit, 1:8000 in 1,5 %<br>MP in TBS-T, 1 h RT |

**TBS-T Buffer:** 20 mM Tris-HCl (pH 7.6); Trizma®-Base –Solution (#77-86-1, Merck Millipore, Burlington, Massachusetts, USA), 0.137 M NaCl (#7647-14-5, Merck Millipore, Burlington, Massachusetts, USA), 10 % Tween-20 (#11332465001, Merck Millipore, Burlington, Massachusetts, USA)

**MP:** Milk powder (#1706404, Bio-Rad, Hercules, California, USA)

**BSA:** Bovine serum albumin (#8076.1, Carl Roth, Karlsruhe, Germany)

## Embedding cells in paraffin for HABP histochemistry

Cells at a confluency of 80 % were first washed with 20 mL PBS (+/-) and then softly removed with a cell scraper. Cells were then centrifuged (5 min, 12000 rpm, RT) and fixed with 3.7 % phosphate-buffered formalin solution for 20 min at RT. After two washing steps, the cell pellet was finally suspended in 200 µL of 2 % liquid (liquefied in 55 °C water bath) Difco™ Agar Nobel (#11798223, Thermo Fisher Scientific, Waltham, Massachusetts, USA). The resulting cooled cell-agar pellet was embedded in paraffin. Here, the fixed cell pellet was dehydrated in an automated tissue processor and incubated in liquid paraffin in a pouring device twice for 5 h at 63 °C. The paraffin-impregnated cell pellet was transferred to metal molds with paraffin at 63 °C and cooled down.

## Detection of circulating tumor cells via human Alu-PCR

DNA was isolated from 250 µL of whole blood using peqGOLD Blood & Tissue DNA Mini Kit (#13-3396-02, VWR International, Radnor, Pennsylvania, USA) according to the manufacturer's protocol.

Afterward, quantitative real-time PCR for human Alu-sequences was performed as described previously [38]. Primer sequences can be found in supplementary materials and methods.
