# Supplementary material for: Key Role of Hyaluronan Metabolism for the Development of Brain Metastases in Triple-Negative Breast Cancer
Source: MDPI journal article supplement (doi:10.3390/cells11203275), 2022-10-18
Supplement: s1 [file s1]

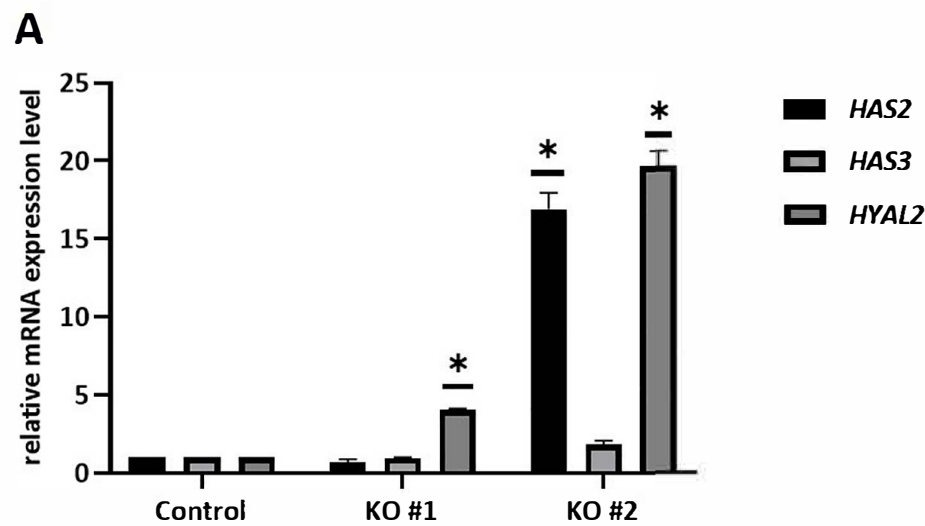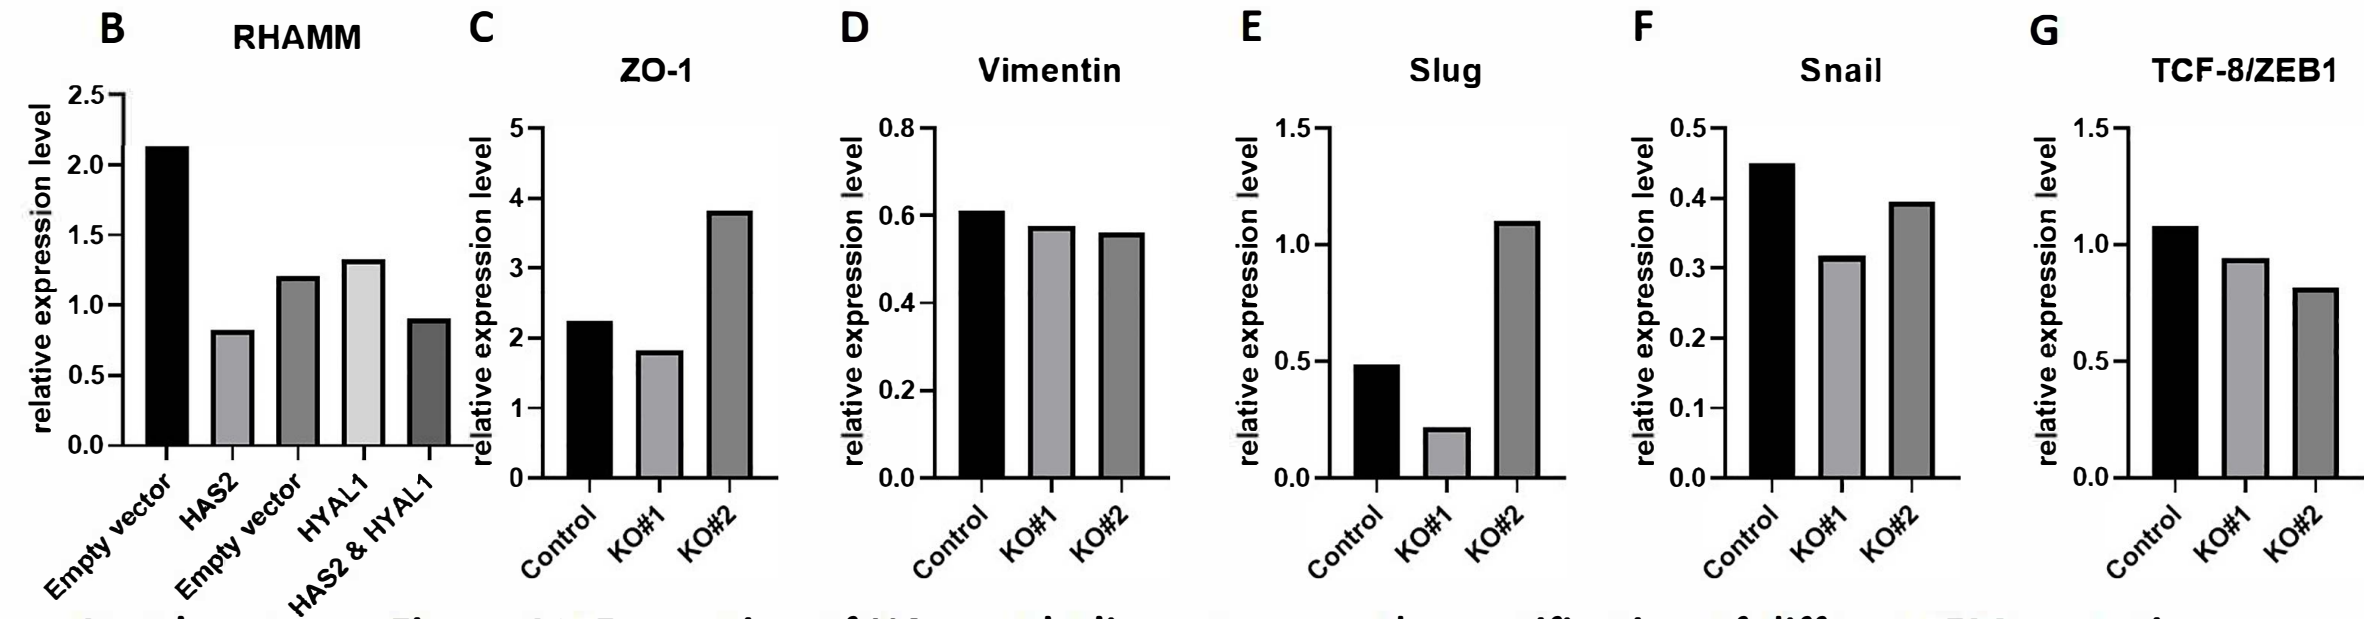

**Supplementary Figure S1: Expression of HA metabolic enzymes and quantification of different EMT protein expression levels in HYAL1 KO clones**

**(A)** Relative mRNA expression level of *HAS2*, *HAS3*, and *HYAL2* measured by qRT-PCR. Values are normalized to corresponding *GAPDH* expression ( $n=2$ ). Relative EMT protein expression from representative Western Blot was quantified by densitometry of **(B)**  $\beta$ -Catenin, **(C)** ZO-1, **(D)** Vimentin, **(E)** Slug, **(F)** Snail and **(G)** TCF-8/ZEB1 for MDA-MB-231-BR Control as well as HYAL1 KO #1 and KO #2 cells. Statistical significance was determined using unpaired two-tailed Student's *t*-tests. The assumption of homogeneity of variance was tested using Levene's Test of Equality of Variances ( $p>0.05$ ). Values are means + s.d. \* $p<0.05$ .
