# Supplementary material for: Key Role of Hyaluronan Metabolism for the Development of Brain Metastases in Triple-Negative Breast Cancer
Source: MDPI journal article supplement (doi:10.3390/cells11203275), 2022-10-18
Supplement: s1 [file s1]

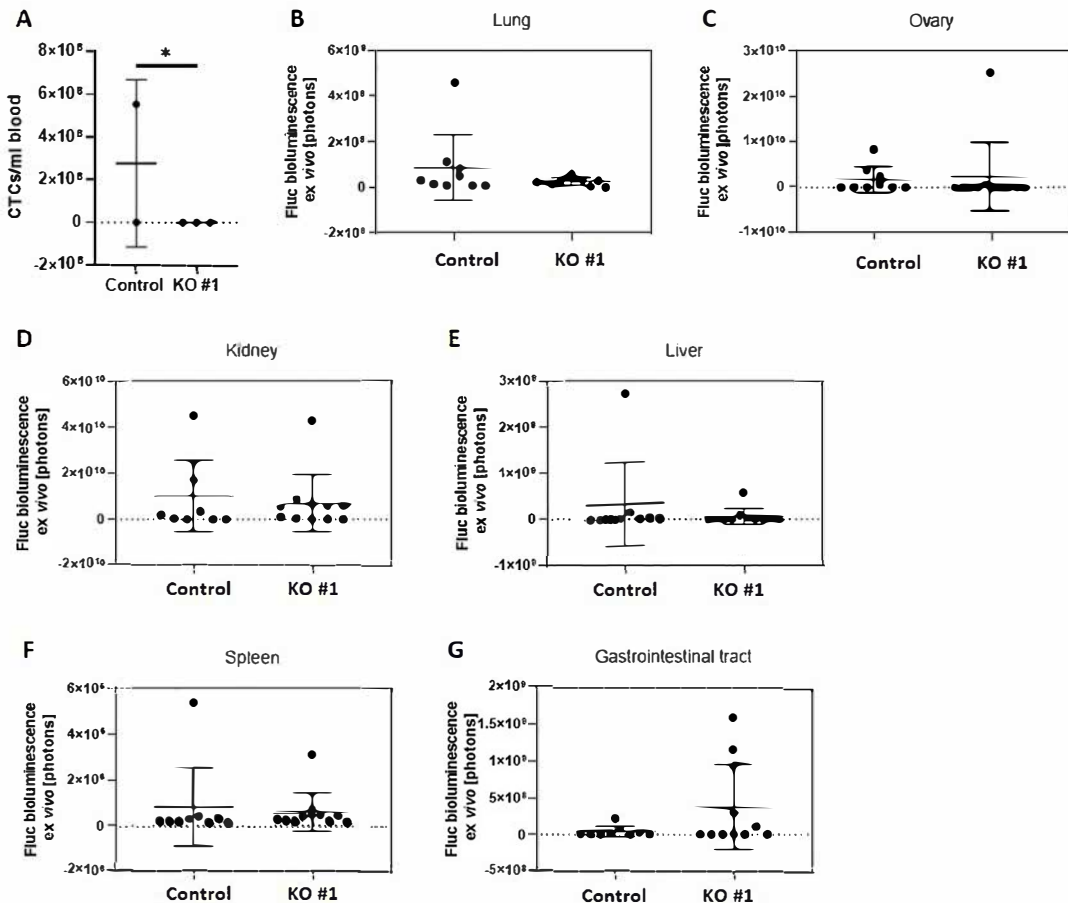

**Supplementary Figure S2: Additional in vivo data of HYAL1 KO mouse model.**

(A) Number of CTCs quantified by ALU-PCR from blood. Ex vivo BLI signals from (B) lungs, (C) ovary, (D) kidney, (E) liver, (F) spleen and (G) gastrointestinal tract of both groups (MDA-MB-231-BR control: n=9, HYAL1 KO #1: n=11). Statistical significance was determined using unpaired two-tailed Student's t-tests. The assumption of homogeneity of variance was tested using Levene's Test of Equality of Variances ( $p > 0.05$ ). Values are means + s.d. \* $p < 0.05$ .
