# Supplementary material for: Key Role of Hyaluronan Metabolism for the Development of Brain Metastases in Triple-Negative Breast Cancer
Source: Cells. 2022 Oct 18;11(20):3275. doi: 10.3390/cells11203275 (PMC9600690; doi:10.3390/cells11203275)
Supplement: Supplementary file 1 [file cells-11-03275-s001.zip]

Archive with 4 entries (4 files):
- Supplementary Figure S1.pdf
- Supplementary Figure S2.pdf
- Supplementary Figure S3.pdf
- Supplementary Materials and Methods_final.pdf
